# Supplementary material for: TCR Repertoire as a Novel Indicator for Immune Monitoring and Prognosis Assessment of Patients With Cervical Cancer
Source: PubMed Central journal article supplement (PMC6262070; doi:10.3389/fimmu.2018.02729), 2018-11-22
Supplement: Table_1.pdf [file Table_1.pdf]

**Table S1. The clinical information and high throughput sequencing results of each peripheral blood sample from 25 CC patients, 30 CIN patients and 20 healthy women.**

| Groups | Sample ID | Age (years) | Clinical satge | Pathological Type                                            | Number of V gene | Number of J gene | Number of Total TCRβ CDR3 aa sequences | Number of TCRβ CDR3 Unique aa sequences | Shannon's entropy |
|--------|-----------|-------------|----------------|--------------------------------------------------------------|------------------|------------------|----------------------------------------|-----------------------------------------|-------------------|
| CC     | CC1       | 50          | IB1            | Moderately differentiated adenocarcinoma                     | 63               | 13               | 1774550                                | 99083                                   | 11.86             |
|        | CC2       | 48          | IB1            | Moderately differentiated squamous cell carcinoma            | 63               | 13               | 1337082                                | 53031                                   | 9.39              |
|        | CC3       | 44          | IB1            | Moderately and poorly differentiated squamous cell carcinoma | 63               | 13               | 1313928                                | 33236                                   | 7.83              |
|        | CC4       | 50          | IB1            | Moderately differentiated squamous cell carcinoma            | 61               | 13               | 868119                                 | 36081                                   | 9.68              |
|        | CC5       | 54          | IB1            | Moderately differentiated squamous cell carcinoma            | 62               | 13               | 1232647                                | 56452                                   | 11.25             |
|        | CC6       | 43          | IB1            | Moderately differentiated squamous cell carcinoma            | 63               | 13               | 1361985                                | 25071                                   | 4.73              |
|        | CC7       | 44          | IB1            | Moderately differentiated adenocarcinoma                     | 64               | 13               | 1383129                                | 16218                                   | 6.15              |
|        | CC8       | 54          | IB1            | Moderately and poorly differentiated squamous cell carcinoma | 64               | 13               | 1357070                                | 32359                                   | 8.77              |
|        | CC9       | 58          | IB1            | Moderately differentiated squamous cell carcinoma            | 62               | 13               | 1423327                                | 32701                                   | 9.08              |
|        | CC10      | 38          | IB1            | Moderately differentiated adenocarcinoma                     | 62               | 13               | 1421947                                | 12487                                   | 5.71              |
|        | CC11      | 39          | IB1            | Moderately differentiated squamous cell carcinoma            | 60               | 13               | 932736                                 | 24506                                   | 8.07              |
|        | CC12      | 43          | IB2            | Moderately differentiated squamous cell carcinoma            | 62               | 13               | 731035                                 | 4895                                    | 2.25              |
|        | CC13      | 50          | IB2            | Moderately differentiated adenocarcinoma                     | 55               | 13               | 1555579                                | 9307                                    | 3.57              |
|        | CC14      | 50          | IB2            | Moderately differentiated adenocarcinoma & squamous          | 57               | 13               | 2317370                                | 58314                                   | 8.96              |
|        | CC15      | 44          | IB2            | Moderately differentiated squamous cell carcinoma            | 63               | 13               | 748552                                 | 21925                                   | 7.95              |
|        | CC16      | 54          | IIA            | Poorly differentiated adenocarcinoma                         | 61               | 13               | 1209030                                | 16713                                   | 6.96              |
|        | CC17      | 54          | IIB            | Moderately differentiated squamous cell carcinoma            | 62               | 13               | 2388308                                | 47433                                   | 8.86              |
|        | CC18      | 53          | IIB            | Moderately differentiated squamous cell carcinoma            | 64               | 13               | 1544705                                | 9054                                    | 3.09              |
|        | CC19      | 35          | IIB            | Moderately differentiated squamous cell carcinoma            | 58               | 13               | 1434049                                | 9584                                    | 4.38              |
|        | CC20      | 53          | IIIB           | Moderately differentiated squamous cell carcinoma            | 62               | 13               | 1075236                                | 11116                                   | 5.77              |
|        | CC21      | 48          | IIIB           | Moderately differentiated squamous cell carcinoma            | 60               | 13               | 1645938                                | 13704                                   | 5.42              |
|        | CC22      | 55          | IIIB           | Moderately differentiated squamous cell carcinoma            | 64               | 13               | 1455260                                | 11553                                   | 4.86              |
|        | CC23      | 54          | IVA            | Moderately differentiated squamous cell carcinoma            | 60               | 13               | 1725250                                | 12765                                   | 4.6               |
|        | CC24      | 45          | IVB            | Moderately differentiated squamous cell carcinoma            | 58               | 13               | 1010047                                | 13210                                   | 5.75              |
|        | CC25      | 60          | IVB            | Moderately differentiated adenocarcinoma                     | 63               | 13               | 963036                                 | 16231                                   | 5.81              |
| CIN    | CIN1      | 45          | CIN-1          | -                                                            | 61               | 13               | 1056491                                | 41141                                   | 10.41             |
|        | CIN2      | 35          | CIN-1          | -                                                            | 60               | 13               | 516789                                 | 20622                                   | 6.84              |
|        | CIN3      | 27          | CIN-1          | -                                                            | 61               | 13               | 1771477                                | 16483                                   | 5.36              |
|        | CIN4      | 22          | CIN-1          | -                                                            | 65               | 13               | 1592677                                | 34230                                   | 8.38              |
|        | CIN5      | 50          | CIN-1          | -                                                            | 63               | 13               | 1521178                                | 36462                                   | 9.36              |
|        | CIN6      | 50          | CIN-1          | -                                                            | 64               | 13               | 1441418                                | 22707                                   | 6.49              |
|        | CIN7      | 31          | CIN-1          | -                                                            | 62               | 13               | 1892292                                | 39502                                   | 7.6               |
|        | CIN8      | 53          | CIN-1          | -                                                            | 61               | 13               | 1181841                                | 12149                                   | 5.98              |
|        | CIN9      | 30          | CIN-1          | -                                                            | 64               | 13               | 1832448                                | 39961                                   | 8.43              |
|        | CIN10     | 31          | CIN-1          | -                                                            | 61               | 13               | 626609                                 | 23243                                   | 9.01              |
|        | CIN11     | 32          | CIN-2          | -                                                            | 60               | 13               | 676085                                 | 20435                                   | 7.31              |
|        | CIN12     | 34          | CIN-2          | -                                                            | 64               | 13               | 1342912                                | 49715                                   | 9.52              |
|        | CIN13     | 50          | CIN-2          | -                                                            | 62               | 13               | 1502572                                | 19755                                   | 6.8               |

|               |          |       |       |    |    |         |         |       |       |
|---------------|----------|-------|-------|----|----|---------|---------|-------|-------|
| CIN           | CIN14    | 27    | CIN-2 | -  | 60 | 13      | 880097  | 21840 | 8.59  |
|               | CIN15    | 42    | CIN-2 | -  | 62 | 13      | 1008249 | 34871 | 10.23 |
|               | CIN16    | 55    | CIN-2 | -  | 63 | 13      | 1511031 | 42578 | 9.71  |
|               | CIN17    | 40    | CIN-2 | -  | 63 | 13      | 1554626 | 37338 | 9.16  |
|               | CIN18    | 33    | CIN-2 | -  | 63 | 13      | 1490492 | 43713 | 9.73  |
|               | CIN19    | 45    | CIN-2 | -  | 63 | 13      | 1067364 | 35432 | 9.71  |
|               | CIN20    | 37    | CIN-3 | -  | 62 | 13      | 1717962 | 20983 | 6.43  |
|               | CIN21    | 38    | CIN-3 | -  | 63 | 13      | 2023772 | 32055 | 6.38  |
|               | CIN22    | 43    | CIN-3 | -  | 62 | 13      | 1101932 | 12842 | 6.29  |
|               | CIN23    | 39    | CIN-3 | -  | 61 | 13      | 1008130 | 38550 | 9.13  |
|               | CIN24    | 48    | CIN-3 | -  | 62 | 13      | 1298034 | 32854 | 8.7   |
|               | CIN25    | 44    | CIN-3 | -  | 63 | 13      | 1858192 | 40902 | 8.54  |
|               | CIN26    | 43    | CIN-3 | -  | 63 | 13      | 1716479 | 33871 | 8.31  |
|               | CIN27    | 23    | CIN-3 | -  | 64 | 13      | 1286419 | 33053 | 8.43  |
|               | CIN28    | 30    | CIN-3 | -  | 56 | 13      | 629056  | 9094  | 6.41  |
| CIN29         | 29       | CIN-3 | -     | 63 | 13 | 2939431 | 50214   | 8     |       |
| CIN30         | 43       | CIN-3 | -     | 63 | 13 | 1867940 | 76503   | 11.03 |       |
| Healthy women | Health1  | 34    | -     | -  | 63 | 13      | 985607  | 90952 | 11.66 |
|               | Health2  | 44    | -     | -  | 62 | 13      | 440549  | 28935 | 8.84  |
|               | Health3  | 48    | -     | -  | 64 | 13      | 678607  | 39764 | 7.8   |
|               | Health4  | 54    | -     | -  | 62 | 13      | 571837  | 48119 | 9.26  |
|               | Health5  | 59    | -     | -  | 63 | 13      | 886934  | 88837 | 12.02 |
|               | Health6  | 50    | -     | -  | 63 | 13      | 964906  | 80164 | 10.77 |
|               | Health7  | 52    | -     | -  | 62 | 13      | 842442  | 67712 | 10.77 |
|               | Health8  | 55    | -     | -  | 63 | 13      | 736221  | 62081 | 10.71 |
|               | Health9  | 53    | -     | -  | 62 | 13      | 462092  | 31759 | 8.92  |
|               | Health10 | 56    | -     | -  | 63 | 13      | 502974  | 35821 | 9.39  |
|               | Health11 | 42    | -     | -  | 64 | 13      | 886352  | 71703 | 10.4  |
|               | Health12 | 43    | -     | -  | 63 | 13      | 753224  | 86683 | 12.35 |
|               | Health13 | 45    | -     | -  | 61 | 13      | 432053  | 31986 | 7.02  |
|               | Health14 | 39    | -     | -  | 63 | 13      | 928187  | 82577 | 11.1  |
|               | Health15 | 47    | -     | -  | 63 | 13      | 744726  | 49315 | 9.68  |
|               | Health16 | 41    | -     | -  | 64 | 13      | 1092474 | 85304 | 10.73 |
|               | Health17 | 37    | -     | -  | 64 | 13      | 943125  | 81984 | 10.96 |
|               | Health18 | 48    | -     | -  | 64 | 13      | 1644423 | 50163 | 9.04  |
|               | Health19 | 54    | -     | -  | 64 | 13      | 2719021 | 61512 | 7.69  |
|               | Health20 | 57    | -     | -  | 62 | 13      | 752118  | 62181 | 9.74  |
