# Supplementary material for: TCR Repertoire as a Novel Indicator for Immune Monitoring and Prognosis Assessment of Patients With Cervical Cancer
Source: PubMed Central journal article supplement (PMC6262070; doi:10.3389/fimmu.2018.02729), 2018-11-22
Supplement: Table_2.pdf [file Table_2.pdf]

**Table S2. The clinical information and high throughput sequencing results of each tumor or sentinel lymphatic node sample from 16 CC patients.**

| Sample ID | Age (years) | FIGO satge | Pathological Type                                              | Disease status                              | Number of V gene | Number of J gene | Number of Total TCRβ CDR3 aa sequences | Number of TCRβ CDR3 Unique aa sequences | Shannon's entropy |
|-----------|-------------|------------|----------------------------------------------------------------|---------------------------------------------|------------------|------------------|----------------------------------------|-----------------------------------------|-------------------|
| T1        | 61          | IB1        | Moderately differentiated squamous cell carcinoma              | Non-progression                             | 60               | 13               | 2083672                                | 38855                                   | 7.03              |
| L1        |             |            |                                                                |                                             | 63               | 13               | 1140369                                | 91096                                   | 13.67             |
| T2        | 67          | IB1        | Poorly differentiated squamous cell carcinoma                  | Progression (metastasis)                    | 62               | 13               | 1438642                                | 18222                                   | 3.88              |
| L2        |             |            |                                                                |                                             | 62               | 13               | 870982                                 | 85725                                   | 13.99             |
| T3        | 42          | IB1        | Moderately differentiated squamous cell carcinoma              | Progression (metastasis)                    | 61               | 13               | 2427006                                | 26719                                   | 4.77              |
| L3        |             |            |                                                                |                                             | 63               | 13               | 857880                                 | 82922                                   | 14.03             |
| T4        | 54          | IB1        | Moderately differentiated squamous cell carcinoma              | Non-progression                             | 61               | 13               | 2098758                                | 63083                                   | 9.32              |
| L4        |             |            |                                                                |                                             | 63               | 13               | 1115408                                | 134024                                  | 14.73             |
| T5        | 31          | IB2        | Moderately differentiated squamous cell carcinoma              | Progression (dead)                          | 63               | 13               | 2122212                                | 51778                                   | 7.67              |
| L5        |             |            |                                                                |                                             | 61               | 13               | 836455                                 | 49422                                   | 12.14             |
| T6        | 47          | IB1        | Moderately differentiated squamous cell carcinoma              | Progression (metastasis)                    | 62               | 13               | 1440264                                | 32359                                   | 7.97              |
| L6        |             |            |                                                                |                                             | 61               | 13               | 791734                                 | 59630                                   | 12.93             |
| T7        | 46          | IB1        | Moderately differentiated squamous cell carcinoma              | Non-progression                             | 62               | 13               | 1051658                                | 33913                                   | 8.89              |
| L7        |             |            |                                                                |                                             | 62               | 13               | 734020                                 | 71408                                   | 14.11             |
| T8        | 51          | IB1        | Moderately differentiated squamous cell carcinoma              | Non-progression                             | 61               | 13               | 1816074                                | 39619                                   | 7.42              |
| L8        |             |            |                                                                |                                             | 63               | 13               | 1094322                                | 89914                                   | 13.94             |
| T9        | 33          | IB1        | Moderately differentiated squamous cell carcinoma              | Unknown                                     | 63               | 13               | 1555746                                | 43676                                   | 8.05              |
| L9        |             |            |                                                                |                                             | 64               | 13               | 1028897                                | 79284                                   | 13.25             |
| T10       | 28          | IB1        | Moderately differentiated squamous cell carcinoma              | Progression (recurrence)                    | 64               | 13               | 2779271                                | 57394                                   | 7.19              |
| L10       |             |            |                                                                |                                             | 63               | 13               | 1516685                                | 99067                                   | 13.03             |
| T11       | 40          | IB1        | Poorly differentiated adenocarcinoma & squamous cell carcinoma | Progression (recurrence)                    | 61               | 13               | 1571686                                | 49259                                   | 9.68              |
| L11       |             |            |                                                                |                                             | 62               | 13               | 724371                                 | 81281                                   | 14.33             |
| T12       | 47          | IB1        | Moderately differentiated squamous cell carcinoma              | Non-progression                             | 63               | 13               | 1697803                                | 40164                                   | 7.30              |
| L12       |             |            |                                                                |                                             | 62               | 13               | 1074088                                | 99905                                   | 13.78             |
| T13       | 58          | IB1        | Moderately differentiated squamous cell carcinoma              | Non-progression                             | 62               | 13               | 2238375                                | 62609                                   | 8.48              |
| L13       |             |            |                                                                |                                             | 63               | 13               | 1441663                                | 127465                                  | 14.13             |
| T14       | 54          | IB1        | Moderately differentiated squamous cell carcinoma              | Non-progression                             | 63               | 13               | 1970853                                | 48302                                   | 7.71              |
| L14       |             |            |                                                                |                                             | 62               | 13               | 819866                                 | 114506                                  | 14.87             |
| T15       | 43          | IB1        | Moderately and poorly differentiated squamous cell carcinoma   | Non-progression                             | 62               | 13               | 1459226                                | 45600                                   | 8.19              |
| L15       |             |            |                                                                |                                             | 63               | 13               | 1620825                                | 143731                                  | 14.60             |
| T16       | 36          | IB2        | Moderately differentiated squamous cell carcinoma              | progression (recurrence, metastasis, death) | 64               | 13               | 2101246                                | 31400                                   | 6.34              |
| L16       |             |            |                                                                |                                             | 58               | 13               | 94748                                  | 14887                                   | 7.57              |
