# Supplementary material for: TCR Repertoire as a Novel Indicator for Immune Monitoring and Prognosis Assessment of Patients With Cervical Cancer
Source: PubMed Central journal article supplement (PMC6262070; doi:10.3389/fimmu.2018.02729), 2018-11-22
Supplement: Table_3.pdf [file Table_3.pdf]

**TABLE S3 | The detail information of disease-associated TCR clonotypes.**

| <b>CC-associated<br/>TCR sequences</b> | <b>CDR3 sequences</b>                   | <b>CC patients</b>    | <b>CIN patients<br/>&amp;Healthy</b> | <b>P value</b>                      |
|----------------------------------------|-----------------------------------------|-----------------------|--------------------------------------|-------------------------------------|
|                                        | CASSLDPGLYEQYF                          | 9                     | 0                                    | 0.000016                            |
|                                        | CASSLQSSSYEQYF                          | 9                     | 0                                    | 0.000016                            |
|                                        | CASSQRTSGTIYNEQFF                       | 9                     | 0                                    | 0.000016                            |
|                                        | CSARDWRDYNEQFF                          | 9                     | 0                                    | 0.000016                            |
|                                        | CAIRDKETRNEQFF                          | 8                     | 0                                    | 0.000064                            |
|                                        | CASKAGANVLTf                            | 8                     | 0                                    | 0.000064                            |
|                                        | CASSDRQTGAVSFRETQYF                     | 8                     | 0                                    | 0.000064                            |
|                                        | <b>CIN-associated<br/>TCR sequences</b> | <b>CDR3 sequences</b> | <b>CIN</b>                           | <b>CC patients<br/>&amp;Healthy</b> |
| CASSLEQLVRSETQYF                       |                                         | 11                    | 0                                    | 0.000011                            |
| CASSPGDRLYEQYF                         |                                         | 10                    | 0                                    | 0.000036                            |
| CASLQGGQETQYF                          |                                         | 9                     | 0                                    | 0.000114                            |
| CASSLNGAQKETQYF                        |                                         | 9                     | 0                                    | 0.000114                            |
| CASSLRQKETQYF                          |                                         | 9                     | 0                                    | 0.000114                            |
| CASSPDRVADTQYF                         |                                         | 9                     | 0                                    | 0.000114                            |
| CATSARDSYGYTF                          |                                         | 9                     | 0                                    | 0.000114                            |
| CSAIAGSSTDTQYF                         |                                         | 9                     | 0                                    | 0.000114                            |
| CSARGADWFTEQYF                         |                                         | 9                     | 0                                    | 0.000114                            |
| CSARGPLVGGGLGEQFF                      |                                         | 9                     | 0                                    | 0.000114                            |
| CSASGGSQYF                             |                                         | 9                     | 0                                    | 0.000114                            |
